# Supplementary material
Source: MDPI journal article supplement (https://www.mdpi.com/2071-1050/9/7/1220)
Supplement: s1 [file s1]

### Supplementary: 18-Questions Core Food Security Module

|    |                                                                                                                                                                                                 |                      |                         |                      |
|----|-------------------------------------------------------------------------------------------------------------------------------------------------------------------------------------------------|----------------------|-------------------------|----------------------|
| 1  | “We worried whether our food would run out before we got money to buy more.” Was that often, sometimes, or never true for you in the last 12 months?                                            | Often<br>(9) (8) (7) | Sometime<br>(6) (5) (4) | Never<br>(3) (2) (1) |
| 2  | “The food that we bought just didn’t last and we didn’t have money to get more.” Was that often, sometimes, or never true for you in the last 12 months?                                        | Often<br>(9) (8) (7) | Sometime<br>(6) (5) (4) | Never<br>(3) (2) (1) |
| 3  | “We couldn’t afford to eat balanced meals.” Was that often, sometimes, or never true for you in the last 12 months?                                                                             | Often<br>(9) (8) (7) | Sometime<br>(6) (5) (4) | Never<br>(3) (2) (1) |
| 4  | In the last 12 months, did you or other adults in the household ever cut the size of your meals or skip meals because there wasn’t enough money for food? (Yes/No)                              | Yes<br>(1)           | No<br>(2)               |                      |
| 5  | (If yes to Question 4) How often did this happen almost every month, some months but not every month, or in only 1 or 2 months?                                                                 | Often<br>(9) (8) (7) | Sometime<br>(6) (5) (4) | Never<br>(3) (2) (1) |
| 6  | In the last 12 months, did you ever eat less than you felt you should because there wasn’t enough money for food? (Yes/No)                                                                      | Yes<br>(1)           | No<br>(2)               |                      |
| 7  | In the last 12 months, were you ever hungry, but didn’t eat, because there wasn’t enough money for food? (Yes/No)                                                                               | Yes<br>(1)           | No<br>(2)               |                      |
| 8  | In the last 12 months, did you lose weight because there wasn’t enough money for food? (Yes/No)                                                                                                 | Yes<br>(1)           | No<br>(2)               |                      |
| 9  | In the last 12 months did you or other adults in your household ever not eat for a whole day because there wasn’t enough money for food? (Yes/No)                                               | Yes<br>(1)           | No<br>(2)               |                      |
| 10 | (If yes to Question 9) How often did this happen almost every month, some months but not every month, or in only 1 or 2 months?                                                                 | Often<br>(9) (8) (7) | Sometime<br>(6) (5) (4) | Never<br>(3) (2) (1) |
| 11 | “We relied on only a few kinds of low-cost food to feed our children because we were running out of money to buy food.” Was that often, sometimes, or never true for you in the last 12 months? | Often<br>(9) (8) (7) | Sometime<br>(6) (5) (4) | Never<br>(3) (2) (1) |
| 12 | “We couldn’t feed our children a balanced meal, because we couldn’t afford that.” Was that often, sometimes, or never true for you in the last 12 months?                                       | Often<br>(9) (8) (7) | Sometime<br>(6) (5) (4) | Never<br>(3) (2) (1) |

|    |                                                                                                                                                            |                |                   |                |
|----|------------------------------------------------------------------------------------------------------------------------------------------------------------|----------------|-------------------|----------------|
| 13 | “The children were not eating enough because we just couldn’t afford enough food.” Was that often, sometimes, or never true for you in the last 12 months? | Often<br>⑨ ⑧ ⑦ | Sometime<br>⑥ ⑤ ④ | Never<br>③ ② ① |
| 14 | In the last 12 months, did you ever cut the size of any of the children’s meals because there wasn’t enough money for food? (Yes/No)                       | Yes<br>①       | No<br>②           |                |
| 15 | In the last 12 months, were the children ever hungry but you just couldn’t afford more food? (Yes/No)                                                      | Yes<br>①       | No<br>②           |                |
| 16 | In the last 12 months, did any of the children ever skip a meal because there wasn’t enough money for food? (Yes/No)                                       | Yes<br>①       | No<br>②           |                |
| 17 | (If yes to Question 16) How often did this happen almost every month, some months but not every month, or in only 1 or 2 months?                           | Often<br>⑨ ⑧ ⑦ | Sometime<br>⑥ ⑤ ④ | Never<br>③ ② ① |
| 18 | In the last 12 months, did any of the children ever not eat for a whole day because there wasn’t enough money for food? (Yes/No)                           | Yes<br>①       | No<br>②           |                |
